# Supplementary material for: “When I Go There, I Feel Like I Can Be Myself.” Exploring Programme Theory within the Wave Project Surf Therapy Intervention
Source: MDPI journal article supplement (doi:10.3390/ijerph16122159), 2019-06-18
Supplement: s1 [file s1]

## Supplementary Materials

### Interview Schedule and additional questions added during data collection

| <b>Initial interview Schedule</b>                                                                                      |
|------------------------------------------------------------------------------------------------------------------------|
| Can you tell me about your experiences at the Wave Project?                                                            |
| Can you describe to me what it was like meeting with new people at the beach?                                          |
| Can you describe to me how you felt when you caught your first wave?                                                   |
| Can you tell me how you felt after the sessions were over?                                                             |
| How would you describe yourself as a person at the beach?                                                              |
| How, if at all, has surfing impacted on your day to day life?                                                          |
| Have you noticed any changes in yourself since you started surfing?                                                    |
| Based on your experiences how would you describe the Wave Project to someone who did not know anything about it?       |
| <b>Additional questions added during data collection</b>                                                               |
| Can you tell me what surfing now means to you?                                                                         |
| Can you describe to me your experiences of the atmosphere at the beach?                                                |
| Can you tell me about working alongside the Wave Project volunteers?                                                   |
| Can you describe to me your expectations of surfing prior to starting? (Follow up: How, if at all have these changed?) |
| Can you expand on the emotions you feel at the beach and in the water?                                                 |
